# Supplementary material
Source: Royal Society of Chemistry journal article supplement (doi:10.1039/b104252c), 2001-09-20
Supplement: b104252c.doc [file b104252c.doc]

# Supplementary Information

Experimental procedure in details:

According to a similar procedure reported previously,10 2D hexagonal mesoporous ferriferous silica SBA-15 films were grown on the silicon wafer by dip coating at room temperature. Tetraethylorthylsilicate (TEOS 1 mol) and EO20PO70EO20 (Pluronic P123, *Mav*=5800, 4.8-34×10-3 mol) were dissolved in ethanol (11-65 mol) that contained HCl (0.002-0.04 mol). Then the proper amount of FeCl36H2O was dissolved in H2O (4.4-12.2 mol) and resultant solution was added to the TEOS solution. After one hour of stirring, a flat silicon substrate was dipped into the solution for a period of time and then pulled out slowly. After the solvent vaporized, a ferriferous silica SBA-15 film with a 2D mesostructure was produced on the silicon surface.

Cubic mesoporous ferriferous silica SBA-16 films were prepared by the same method except the structure-directing agent was Pluronic F127 (*Mav*=12600) EO106PO70EO106. The mol ratio of reactants was: TEOS (1 mol): EO106PO70EO106 (6-11×10-3 mol): H2O (1-2 mol): HCl (0.005-0.015 mol): ethanol (3-4 mol) and corresponding FeCl36H2O.10

2D hexagonal mesoporous ferriferous aluminosilicate film (referred to as HMAS) was also grown similarly. The dip coating solution was prepared as follows. P123 (2.0 g, 3.4x10-4 mol) and FeCl36H2O (0.21 g, 7.7x10-4 mol) were dissolved in a 1:1 mixture (40 g) of CHCl3 (0.105 mol) and THF (0.25 mol) under moderate stirring for one hour stirring, and then a prehydrolyzed solution of (3-glycidyloxypropyl-) trimethoxysiliane (GLYMO) (3.0 g, 0.013 mol) and aluminum *sec*-butoxide (0.6 g, 2.9x10-3 mol) was added.

During the process of preparing macroporous ferriferous silica, a drop of latex spheres (270 nm in diameter) solution was dropped on a silicon surface and allowed to vaporize at room temperature. Then the sol solution containing: TEOS (3.51 g, 1.69x10-2 mol), ethanol (10 g, 0.217 mol), 0.84 g (2 mol/l) HCl (3.4x10-3 mol), 1.103 g H2O (0.10 mol), 1.82 g FeCl36H2O (6.75x10-4 mol) was added into the interstice of the latex spheres. The solvent vaporized in a vaccum desiccator.

All the films with meso and macroscopic structures were calcined at 550 C in air for 6 h to remove the amphiphilic block copolymers or latex templates, followed by a reduction at 700C in a flowing stream of 10% H2/N2 (volume ratio) for 6 h.

CVD growth for MWNTs was performed in a quartz furnace tube at 700 C with an acetylene-nitrogen mixture (2.5% mole ratio). The growth time was typically 10-30 minutes.
